# Supplementary material
Source: MDPI journal article supplement (https://www.mdpi.com/2073-4352/8/9/358)
Supplement: s1 [file s1]

## Supplementary Material

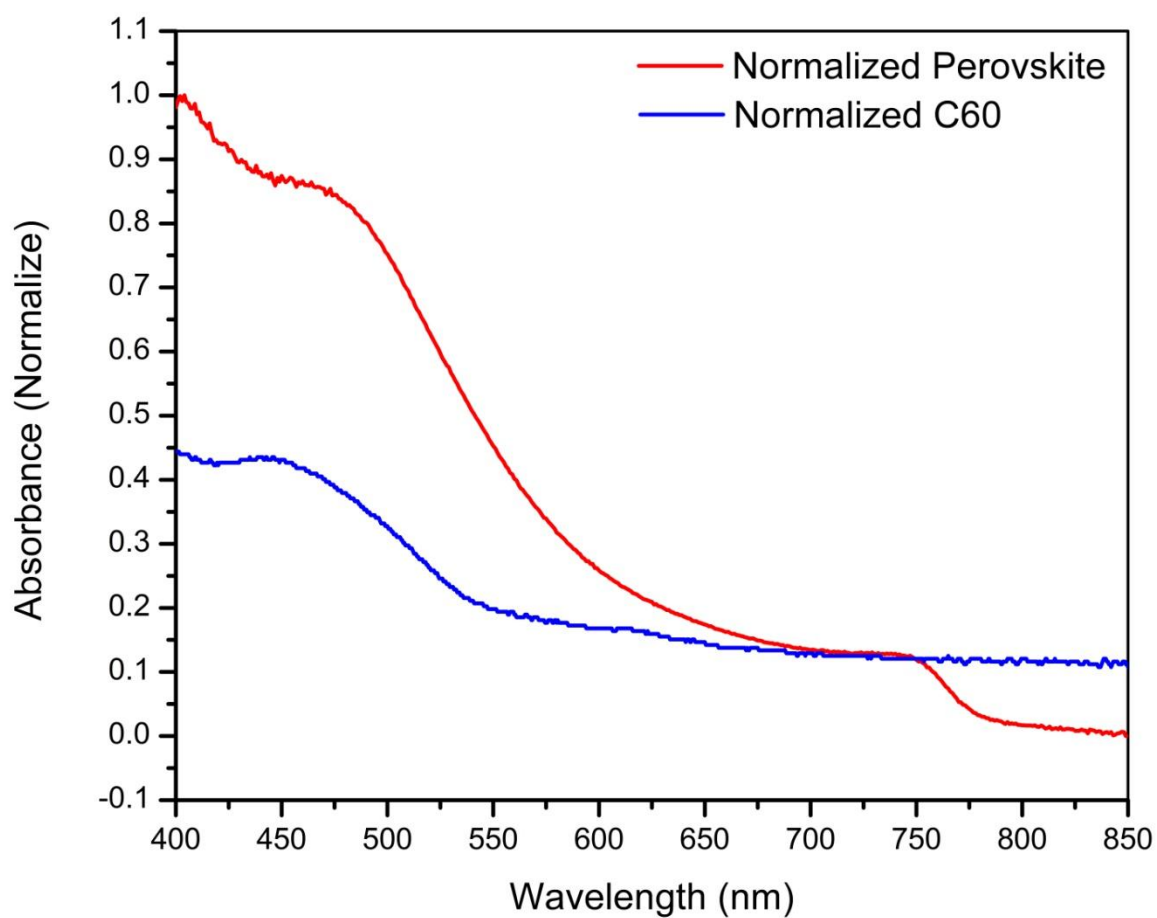

**Supplementary Figure 1.** The normalized absorbance spectrum of active layer, the perovskite material (red curve) and fullerene material (C<sub>60</sub>, blue curve), in the inverted perovskite solar cells from 400-850 nm.

Supplementary Material

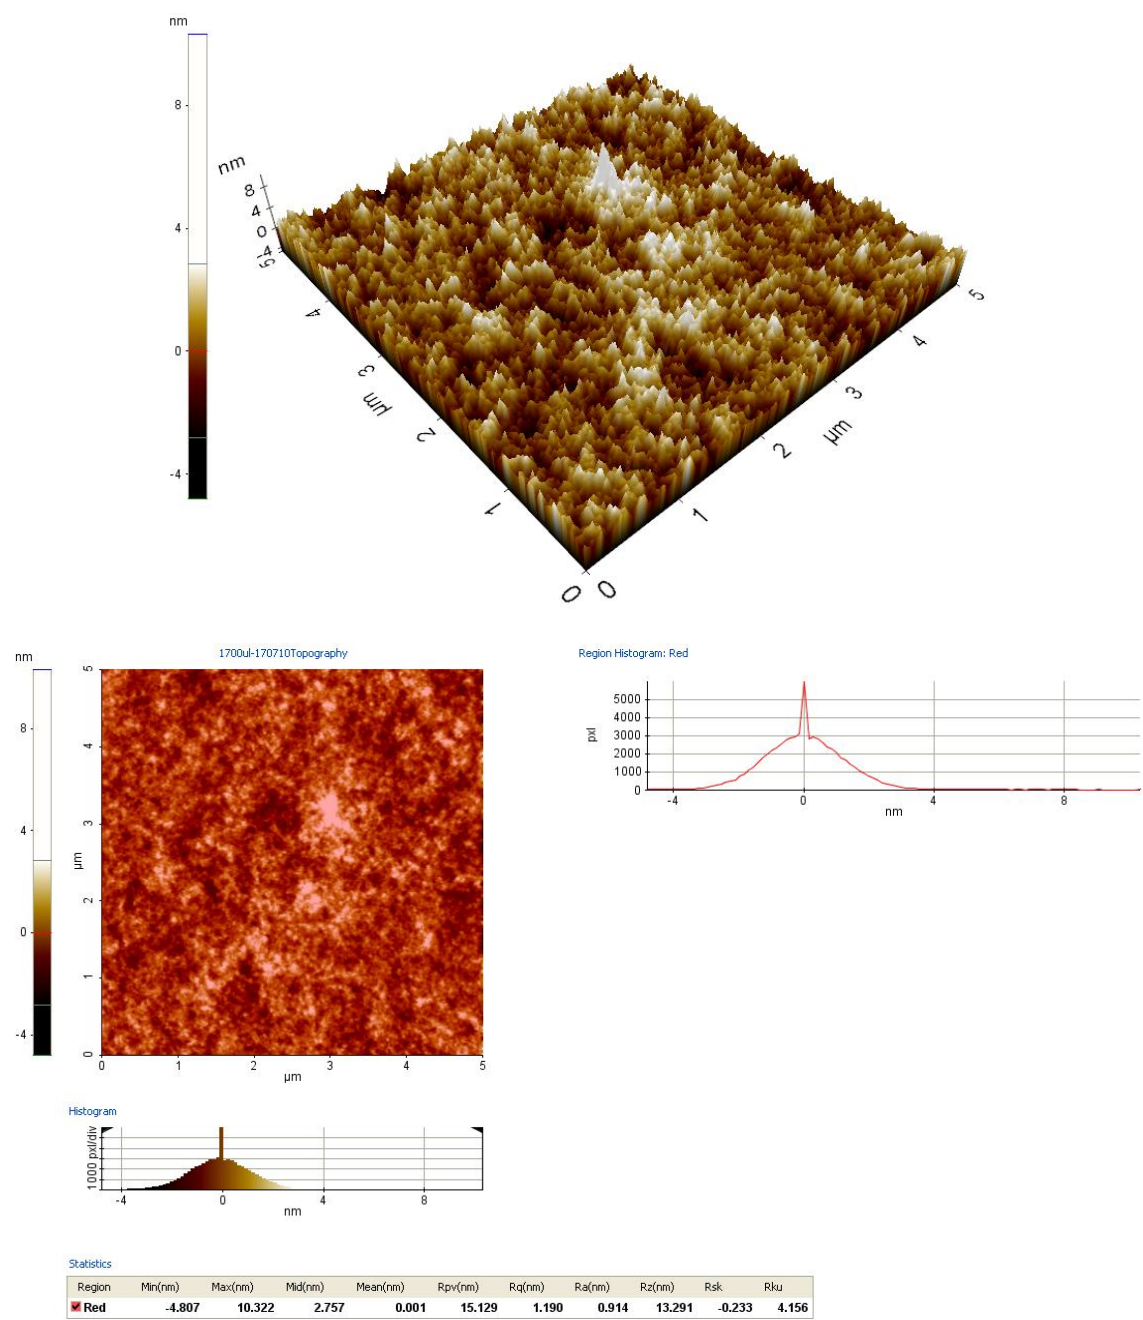

**Supplementary Figure 2(a).** The AFM measurement result for the PSCs with specific tilt angle (X-Y-Z of  $-40^{\circ}$  -  $30^{\circ}$  -  $30^{\circ}$ ) and scan area ( $5 \times 5 \mu\text{m}$ ), which is fabricated through improved PEDOT:PSS solution of 1700  $\mu\text{l}$  as HTL.

Supplementary Material

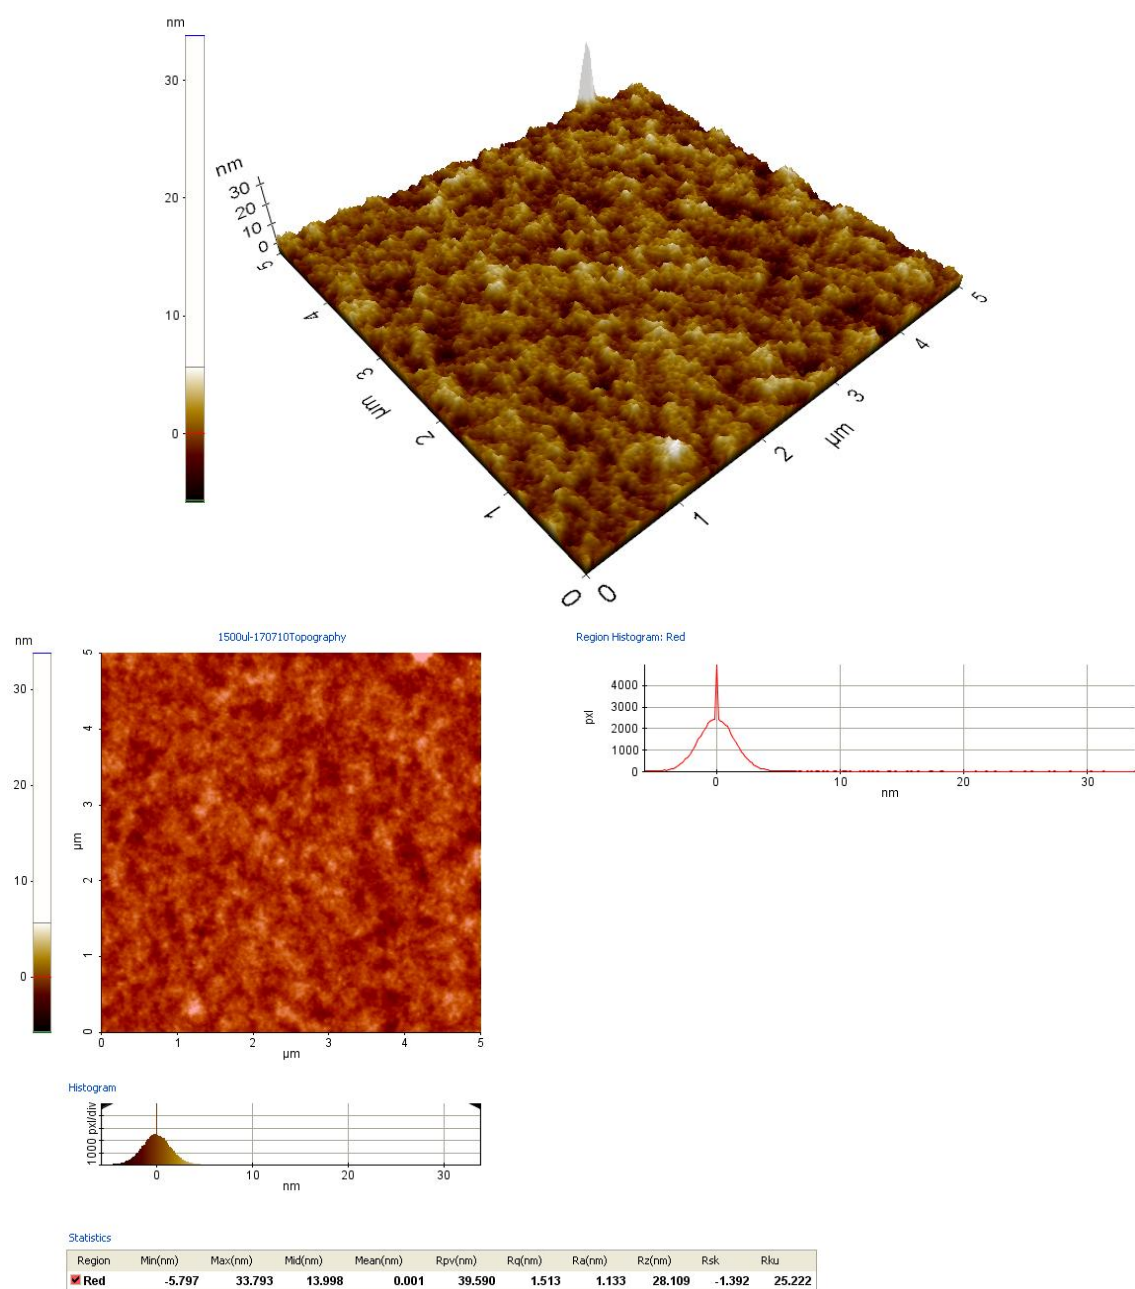

**Supplementary Figure 2(b).** The AFM measurement result for the PSCs with specific tilt angle (X-Y-Z of -40°- 30°- 30°) and scan area (5 × 5 μm), which is fabricated through improved PEDOT:PSS solution of 1500 μl as HTL.

Supplementary Material

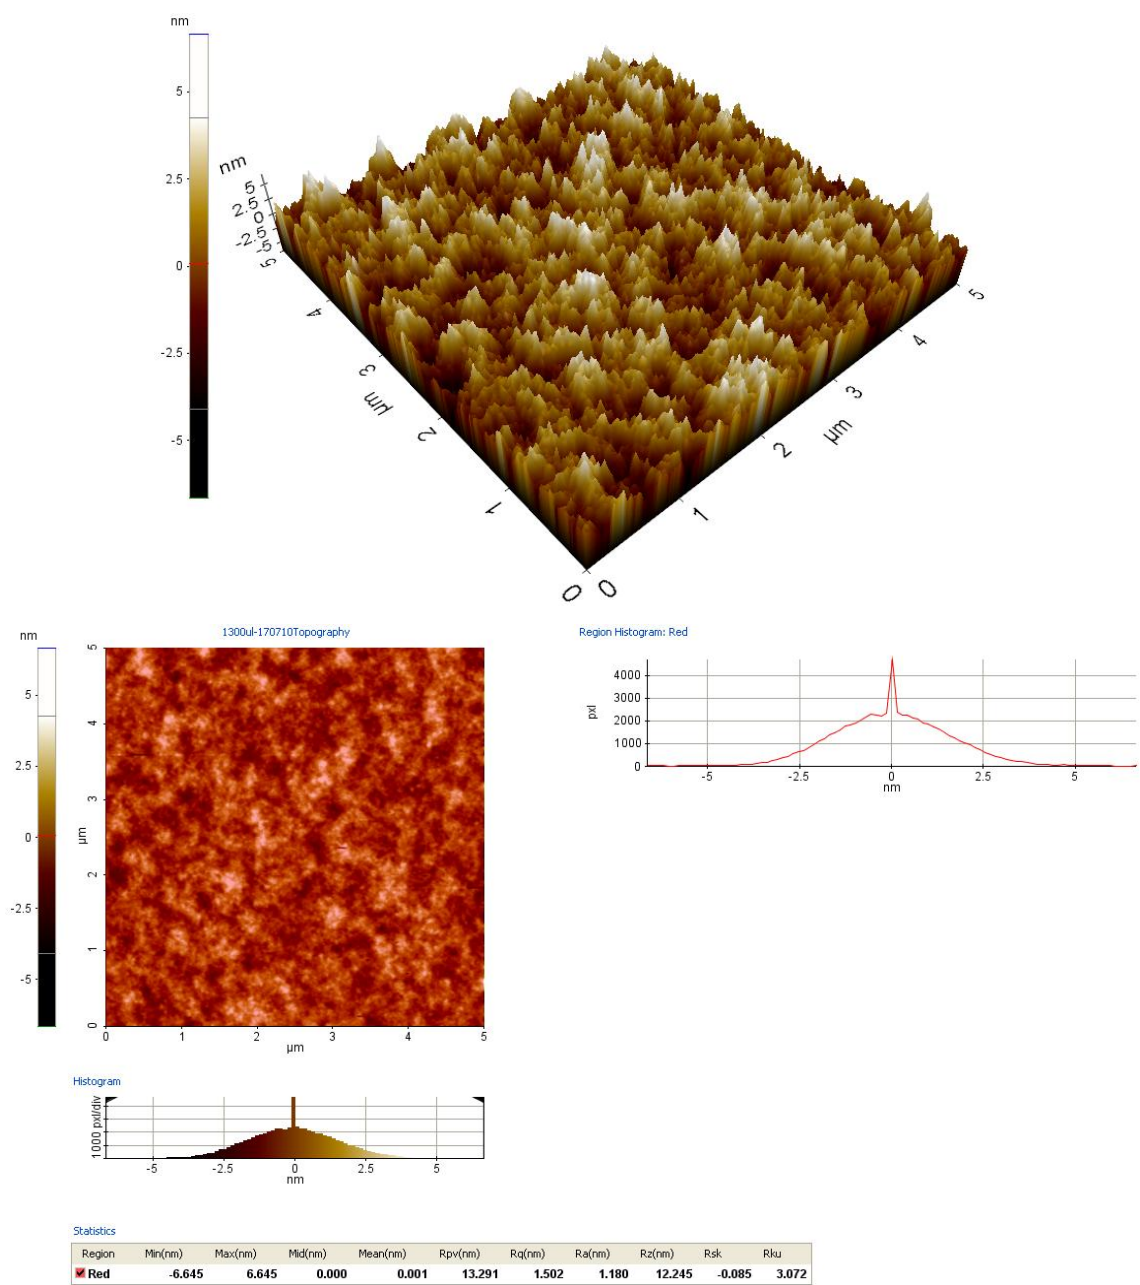

**Supplementary Figure 2(c).** The AFM measurement result for the PSCs with specific tilt angle (X-Y-Z of  $-40^{\circ}$ -  $30^{\circ}$ -  $30^{\circ}$ ) and scan area ( $5 \times 5 \mu\text{m}$ ), which is fabricated through improved PEDOT:PSS solution of  $1300 \mu\text{l}$  as HTL.
